# Supplementary material for: A transforming KIF5B and RET gene fusion in lung adenocarcinoma revealed from whole-genome and transcriptome sequencing
Source: HighWire-hosted journal article supplement (doi:10.1101/gr.133645.111), 2011-12-22
Supplement: SupplementaryInformation_GenRes_AK55_ver500_2revision.pdf [file SupplementaryInformation_GenRes_AK55_ver500_2revision.pdf]

## **Supplemental Materials**

**Fusion of *KIF5B* and *RET* transforming gene in lung adenocarcinoma revealed from whole-genome and transcriptome sequencing**

Young Seok Ju, Won-Chul Lee, Jong-Yeon Shin, Seungbok Lee, Thomas Bleazard, Jae-Kyung Won, Young Tae Kim, Jong-Il Kim, Jin-Hyoung Kang and Jeong-Sun Seo

## Contents

### A. Supplemental Methods

|                                       |   |
|---------------------------------------|---|
| (1) Detection of fusion gene          | 4 |
| (2) Estimation of tumor heterogeneity | 7 |

### B. Supplemental Tables

|                                                                                                                                                         |    |
|---------------------------------------------------------------------------------------------------------------------------------------------------------|----|
| (1) A full list of 10,390 non-synonymous SNVs identified from the whole-genome sequence of liver metastatic lung cancer tissue of AK55                  | 8  |
| (2) A full list of 334 CDS indels identified from the whole-genome sequence of liver metastatic lung cancer tissue of AK55                              | 9  |
| (3) A full list of 70 CDS large deletion candidates identified from the whole-genome sequence of liver metastatic lung cancer tissue of AK55            | 10 |
| (4) A full list of 10 RNA editing candidates identified from the whole-genome and transcriptome sequence of liver metastatic lung cancer tissue of AK55 | 11 |
| (5) A full list of 52 fusion genes from transcriptome sequencing                                                                                        | 12 |
| (6) A full list of expression levels of human genes identified from the transcriptome sequencing of cancer tissues of AK55, LC_S1 - S5                  | 14 |
| (7) Summary statistics of transcriptome sequencing from primary lung adenocarcinoma tissues of LC_S1 - S5                                               | 15 |

### C. Supplemental Figures

|                                                                                                                                                                                |    |
|--------------------------------------------------------------------------------------------------------------------------------------------------------------------------------|----|
| (1) Distribution of read-allele frequency (count of SNV reads / (count of SNV + wildtype reads)) in the whole-genome sequencing of liver metastatic lung cancer tissue of AK55 | 16 |
| (2) Comparison of read-depth of whole-genome sequence for 70 CDS large deletion                                                                                                |    |

|                                                                                                                |        |
|----------------------------------------------------------------------------------------------------------------|--------|
| candidates from liver metastatic lung cancer tissue and blood -----                                            | 17     |
| (3) Identification of breakpoint of the <i>KIF5B-RET</i> fusion gene in LC_S6 using<br>Sanger sequencing ----- | 18     |
| (4) RET expression levels in lung adenocarcinomas deposited in TCGA -----                                      | 19     |
| (5) Schematic diagram representing the “Spurious Reads” -----                                                  | 20     |
| (6) Schematic diagram representing the “Stacked/ladder-like pattern” -----                                     | 20     |
| <br>D. References -----                                                                                        | <br>21 |

## **A. Supplemental Methods**

### **(1) Detection of fusion gene**

#### **1) Evidence search**

We searched for discordant read pairs and fusion-spanning reads to detect gene fusion events (Figure 2B). For the paired-end sequencing, most reads in a pair are expected to be mapped to the same chromosome, in the opposite orientation, and within the expected insert size. If the reads in a pair are mapped far away from each other or even mapped to different chromosomes (discordant), there might have been structural variations (such as inversion, deletion, or translocation) which result in a gene fusion event. Furthermore, if a read is broken in two and each half is mapped to different genes (fusion-spanning), it can be additional evidence for gene fusion. From the transcriptome sequencing data, we first extracted such evidence.

#### **2) Fusion candidate detection**

When more than two discordant read pairs and fusion-spanning reads are observed together in two distinct genes, we defined those two genes as a fusion candidate.

#### **3) Filtration cascade**

##### **a. Strand-orientation filter**

DNA strands have directionality, with positive and negative strands. Each human gene is located on either the positive or negative strand of the human genome. Combining the strand-orientation of the candidate fusion genes and that of paired-end reads from transcriptome sequencing enables us to identify the “donor (upstream)” and “receptor (downstream)” genes in the candidates. If the donor (or receptor) gene is not defined uniquely, or strand-orientations are contradictory between the genes and short-reads in a fusion gene candidate, we regarded the

candidate as a sequencing error and discarded it.

#### **b. Homology filter**

If two genes are highly homologous, the reads from the two genes can be misaligned. Therefore, we removed homologous fusion candidates using BLAST<sup>1</sup>. We used bl2seq (BLAST 2 Sequences) in the BLAST package and discarded the fusion candidates where there was a significant similarity (E-value < 0.01) between two genes.

#### **c. Fusion-spanning read filter**

If a fusion-spanning read is aligned by less than 10bp to either gene in the fusion candidate, we considered it as a “spurious read” representing the fusion point and discarded it (Supplemental Figure 5).

#### **d. Fusion point filter**

Genuine fusion points are anticipated to show a stacked/ladder-like pattern with more than two fusion-spanning reads<sup>2</sup>. If multiple fusion-spanning reads are generated by PCR duplication, we cannot see this pattern. Therefore, we only accepted a fusion point when it showed a shifting-pattern of more than 3 bp around the fusion point with more than two fusion-spanning reads (Supplemental Figure 6).

### **4) Final fusion listing**

If the fusion candidates passed through all the filtration steps, they were finally accepted as gene fusion events and reported in a list.

### **5) Software for fusion gene detection**

Software used for fusion gene detection in this study (GFP; Gene Fusion Program) is

available in our website (<ftp://ftp.gmi.ac.kr/pub/GFP/>). Currently, reads aligned on human reference genome using GSNAP<sup>3</sup> .

## (2) Estimation of tumor heterogeneity

To estimate tumor heterogeneity of liver metastatic lung cancer of AK55, we used read counts for 8 somatic SNVs identified (Supplemental Table 1). Because those SNPs qualified following conservative criteria for somatic SNVs (described in METHODS), we regarded those SNVs as existing in the major subclone of the metastatic cancer. In addition, we regarded all of them as heterozygotes in the subclone, since they are not driver mutations and are highly unlikely to be homozygote.

In the 8 somatic SNVs, combined read-counts for SNV and wildtype allele were 67 and 206, respectively (Total = 273).

As shown in Supplemental Figure 1, read-allele frequencies of heterozygote SNVs showed a distribution clustered around 0.5. Their upper and lower boundaries were approximately 0.15 and 0.85. Given the fact that the above somatic SNVs are in heterozygotes, we expect that ~ 67 wildtype-reads originated from the cancer clone. Therefore, out of a total 273 reads, 134 reads ( $67 \times 2$ ) were from a major subclone. As a result, we may estimate that 49.1 % of our sample of liver metastatic lung cancer tissues was major subclone. Considering the upper and lower boundaries of the distribution (0.15 and 0.85), the possible percentage ranges from 28.8 % to 100%.

Regarding the *KIF5B-RET* fusion gene, we found 8 reads and 6 reads supporting the inversion and normal chromosome structure respectively from the whole-genome sequence of liver metastatic lung adenocarcinoma of AK55. By applying the same strategies, we calculate that this fusion gene originates from 67.7 % - 100 % of liver metastatic lung cancer tissue. Although the total number of reads ( $8 + 6 = 14$ ) may not be sufficient for great precision, we conclude that the fusion gene exists at least in the major subclone of the metastatic cancer tissues.

## B. Supplemental Tables

Supplemental Table 1. A full list of 10,390 non-synonymous SNVs identified from the whole-genome sequence of liver metastatic lung cancer tissue of AK55.

*SuppTable\_1\_nsSNVs\_liverMets.xls*

Depicted below is a preview of the full table.

| Chr  | Pos     | ref | snp | ref_count | wt_count | is_homozygote | annotation       | wt_AA | var_AA | ref_count<br>in_Blood | total_RD<br>in_Blood | is_in_KoreanGenomes<br>(Ju_NatGen2011) | is_in_1KGenomes<br>(Durbin_Nature2010) | is_somatic |
|------|---------|-----|-----|-----------|----------|---------------|------------------|-------|--------|-----------------------|----------------------|----------------------------------------|----------------------------------------|------------|
| chr1 | 59374   | A   | G   | 25        | 0        | Homozygote    | CDS:OR4F5        | T     | A      | 13                    | 13                   | Y                                      | N                                      | N          |
| chr1 | 867694  | T   | C   | 2         | 0        | Homozygote    | CDS:SAMD11       | W     | R      | 1                     | 1                    | Y                                      | Y                                      | N          |
| chr1 | 878522  | T   | C   | 14        | 7        | Heterozygote  | CDS:NOC2L        | I     | V      | 4                     | 9                    | Y                                      | Y                                      | N          |
| chr1 | 899101  | G   | C   | 6         | 10       | Heterozygote  | CDS:PLEKHN1      | R     | P      | 5                     | 7                    | Y                                      | Y                                      | N          |
| chr1 | 899172  | T   | C   | 14        | 0        | Homozygote    | CDS:PLEKHN1      | S     | P      | 9                     | 9                    | Y                                      | Y                                      | N          |
| chr1 | 939471  | G   | A   | 8         | 10       | Heterozygote  | CDS:ISG15        | S     | N      | 2                     | 4                    | Y                                      | Y                                      | N          |
| chr1 | 1110294 | G   | A   | 21        | 14       | Heterozygote  | CDS:TLL10        | S     | N      | 5                     | 9                    | Y                                      | Y                                      | N          |
| chr1 | 1212130 | G   | C   | 7         | 0        | Homozygote    | CDS:SCNN1D       | R     | P      | 4                     | 4                    | Y                                      | Y                                      | N          |
| chr1 | 1259417 | T   | C   | 14        | 0        | Homozygote    | CDS:TAS1R3       | C     | R      | 7                     | 7                    | Y                                      | N                                      | N          |
| chr1 | 1351504 | C   | T   | 12        | 1        | Homozygote    | CDS:TMEM88B      | P     | L      | 1                     | 1                    | Y                                      | Y                                      | N          |
| chr1 | 1377627 | G   | A   | 12        | 18       | Heterozygote  | CDS:ATAD3C       | G     | R      | 4                     | 6                    | Y                                      | N                                      | N          |
| chr1 | 1411854 | G   | A   | 5         | 10       | Heterozygote  | CDS:ATAD3B       | R     | Q      | 1                     | 3                    | Y                                      | N                                      | N          |
| chr1 | 1420831 | A   | T   | 8         | 7        | Heterozygote  | CDS:ATAD3B       | K     | M      | 0                     | 2                    | N                                      | N                                      | N          |
| chr1 | 1548655 | T   | C   | 6         | 7        | Heterozygote  | CDS:MIB2.UTR.MI  | M     | T      | 2                     | 4                    | Y                                      | Y                                      | N          |
| chr1 | 1589675 | C   | T   | 14        | 28       | Heterozygote  | CDS:LOC728661    | V     | I      | 3                     | 20                   | Y                                      | N                                      | N          |
| chr1 | 1624871 | A   | G   | 8         | 14       | Heterozygote  | CDS:CDK11A;Intro | V     | A      | 0                     | 5                    | N                                      | N                                      | N          |
| chr1 | 1628785 | C   | T   | 13        | 12       | Heterozygote  | CDS:CDK11A;Intro | D     | N      | 2                     | 4                    | Y                                      | N                                      | N          |
| chr1 | 1640647 | T   | C   | 47        | 55       | Heterozygote  | CDS:CDK11B;CDK   | H     | R      | 17                    | 55                   | Y                                      | Y                                      | N          |
| chr1 | 1640657 | A   | G   | 45        | 57       | Heterozygote  | CDS:CDK11B;CDK   | C     | R      | 18                    | 52                   | Y                                      | Y                                      | N          |
| chr1 | 1640692 | A   | G   | 37        | 63       | Heterozygote  | CDS:CDK11B;CDK   | V     | A      | 18                    | 61                   | Y                                      | Y                                      | N          |
| chr1 | 1640705 | G   | A   | 27        | 72       | Heterozygote  | CDS:CDK11B;CDK   | R     | W      | 13                    | 54                   | Y                                      | Y                                      | N          |
| chr1 | 1656111 | G   | A   | 16        | 29       | Heterozygote  | CDS:SLC35E2      | R     | W      | 7                     | 19                   | Y                                      | Y                                      | N          |



Supplemental Table 2. A full list of 334 CDS indels identified from the whole-genome sequence of liver metastatic lung cancer tissue of AK55.

*SuppTable\_2\_CDSindels\_liverMets.xls*

Depicted below is a preview of the full table.

| Chr  | start_pos(left) | size<br>(bp) | type | var_allele | var_count | wt_count | gene<br>(exon involved) | total_RD<br>in blood | indel_found<br>in blood | is_in_KoreanGenomes<br>(Ju_NatGen2011) | is_in_1KGenomes<br>(Durbin_Nature2010) | is_somatic |
|------|-----------------|--------------|------|------------|-----------|----------|-------------------------|----------------------|-------------------------|----------------------------------------|----------------------------------------|------------|
| chr1 | 1889968         | 3            | ins  | CCT        | 23        | 3        | KIAA1751                | 11                   | Y                       | N                                      | N                                      | N          |
| chr1 | 2928267         | 3            | del  | -          | 21        | 12       | ACTRT2                  | 8                    | Y                       | Y                                      | Y                                      | N          |
| chr1 | 13978986        | 3            | ins  | CCT        | 30        | 8        | PRDM2                   | 20                   | Y                       | N                                      | N                                      | N          |
| chr1 | 17591258        | 1            | del  | -          | 21        | 1        | PADI6                   | 7                    | Y                       | Y                                      | Y                                      | N          |
| chr1 | 27748104        | 3            | del  | -          | 4         | 13       | AHDC1                   | 3                    | Y                       | N                                      | Y                                      | N          |
| chr1 | 52078651        | 3            | del  | -          | 37        | 18       | NRD1                    | 25                   | Y                       | Y                                      | Y                                      | N          |
| chr1 | 54377907        | 1            | ins  | C          | 6         | 4        | CDCP2                   | 8                    | Y                       | Y                                      | Y                                      | N          |
| chr1 | 62683097        | 3            | del  | -          | 18        | 44       | USP1                    | 39                   | Y                       | N                                      | N                                      | N          |
| chr1 | 67628309        | 3            | del  | -          | 11        | 32       | IL12RB2                 | 34                   | Y                       | N                                      | N                                      | N          |
| chr1 | 74810445        | 3            | del  | -          | 13        | 19       | C1orf173                | 26                   | Y                       | Y                                      | Y                                      | N          |
| chr1 | 77796937        | 3            | ins  | ATT        | 11        | 25       | AK5                     | 33                   | Y                       | N                                      | N                                      | N          |
| chr1 | 86818484        | 6            | del  | -          | 11        | 21       | CLCA4                   | 18                   | Y                       | Y                                      | Y                                      | N          |
| chr1 | 143326608       | 2            | ins  | AA         | 26        | 9        | NBPF9                   | 10                   | Y                       | Y                                      | N                                      | N          |
| chr1 | 143626980       | 1            | del  | -          | 34        | 62       | PDE4DIP                 | 66                   | Y                       | Y                                      | N                                      | N          |
| chr1 | 143635085       | 1            | del  | -          | 35        | 59       | PDE4DIP                 | 55                   | Y                       | Y                                      | N                                      | N          |
| chr1 | 144747332       | 4            | ins  | TATC       | 6         | 22       | NBPF11                  | 17                   | N                       | N                                      | N                                      | Y          |
| chr1 | 150462352       | 1            | del  | -          | 42        | 22       | HRNR                    | 36                   | Y                       | Y                                      | N                                      | N          |
| chr1 | 154831674       | 2            | ins  | CA         | 20        | 6        | GPATCH4                 | 19                   | Y                       | N                                      | N                                      | N          |
| chr1 | 169823508       | 1            | ins  | C          | 33        | 15       | BAT2L2                  | 21                   | Y                       | N                                      | N                                      | N          |
| chr1 | 201404409       | 2            | ins  | CT         | 8         | 19       | MYBPH                   | 6                    | N                       | N                                      | N                                      | N          |
| chr1 | 243351843       | 5            | ins  | TTTTA      | 15        | 39       | EFCAB2                  | 19                   | Y                       | Y                                      | N                                      | N          |
| chr1 | 245681884       | 1            | del  | -          | 19        | 6        | OR2B11                  | 17                   | Y                       | Y                                      | Y                                      | N          |
| chr1 | 246045164       | 3            | del  | -          | 24        | 4        | OR14A16                 | 22                   | Y                       | Y                                      | Y                                      | N          |
| chr1 | 246525498       | 1            | del  | -          | 25        | 6        | OR2T12                  | 28                   | Y                       | Y                                      | Y                                      | N          |
| chr1 | 246579562       | 1            | del  | -          | 20        | 26       | OR14C36                 | 25                   | Y                       | N                                      | N                                      | N          |
| chr1 | 246868567       | 7            | del  | -          | 13        | 4        | OR2T35                  | 16                   | Y                       | Y                                      | Y                                      | N          |

Supplemental Table 3. A full list of 70 CDS large deletion candidates identified from the whole-genome sequence of liver metastatic lung cancer tissue of AK55.

*SuppTable\_3\_CDSCNloss\_LivMets.xls*

Depicted below is a preview of the full table.

| Chr  | Start     | Stop      | size   | # Stretched Reads | RD ratio relative to flanking regions | Genes (exon involved)                   |
|------|-----------|-----------|--------|-------------------|---------------------------------------|-----------------------------------------|
| chr1 | 45799117  | 45800888  | 1772   | 8                 | 0.427046263                           | AKR1A1                                  |
| chr1 | 108534856 | 108538779 | 3924   | 14                | 0.385947037                           | SLC25A24                                |
| chr1 | 143612529 | 143618160 | 5632   | 13                | 0.573020264                           | PDE4DIP                                 |
| chr1 | 143804306 | 143808442 | 4137   | 35                | 0.277033008                           | SEC22B                                  |
| chr1 | 147628609 | 147921627 | 293019 | 7                 | 0.290305917                           | PPIAL4A                                 |
| chr1 | 150594146 | 150594394 | 249    | 23                | 0.04519774                            | FLG2                                    |
| chr1 | 150593980 | 150594290 | 311    | 15                | 0                                     | FLG2                                    |
| chr1 | 153897963 | 153999856 | 101894 | 4                 | 0.880045093                           | YY1AP1,DAP3,GON4L                       |
| chr1 | 159786759 | 159829771 | 43013  | 7                 | 0.663020913                           | FCGR2C                                  |
| chr1 | 199446558 | 199446907 | 350    | 7                 | 0.415584416                           | IGFN1                                   |
| chr1 | 199446241 | 199446843 | 603    | 3                 | 0.281690141                           | IGFN1                                   |
| chr1 | 205760579 | 205932940 | 172362 | 5                 | 0.714263265                           | CR1,CR1L                                |
| chr2 | 110210032 | 111169571 | 959540 | 17                | 0.277648507                           | MALL,NPHP1,LIMS3,RGPD8,RGPD6,RGPD5,BUB1 |
| chr2 | 240630178 | 240630918 | 741    | 3                 | 0                                     | PRR21                                   |
| chr3 | 75869890  | 75870425  | 536    | 10                | 0.730067243                           | ZNF717                                  |
| chr3 | 99364886  | 99404198  | 39313  | 23                | 0.881484439                           | OR5H15                                  |
| chr3 | 131246078 | 131289429 | 43352  | 21                | 0.0408921                             | ALG1L2                                  |
| chr3 | 194714883 | 194715272 | 390    | 7                 | 0.373626374                           | ATP13A4                                 |
| chr3 | 196937734 | 196938314 | 581    | 11                | 0                                     | MUC20                                   |
| chr3 | 196990557 | 196991069 | 513    | 7                 | 0.463768116                           | MUC4                                    |

Supplemental Table 4. A full list of 10 RNA editing candidates identified from the whole-genome and transcriptome sequence of liver metastatic lung cancer tissue of AK55.

| chr   | pos       | ref | var | Genome (LivMets)<br>var_count | Genome (LivMets)<br>total_RD | RNA<br>wt_count | RNA<br>var_count | annotation            | wt_AA | var_AA |
|-------|-----------|-----|-----|-------------------------------|------------------------------|-----------------|------------------|-----------------------|-------|--------|
| chr1  | 62725668  | T   | C   | 0                             | 25                           | 0               | 28               | CDS:DOCK7             | T     | A      |
| chr3  | 44587690  | A   | G   | 0                             | 29                           | 8               | 13               | CDS:ZNF167:Intron:ZNF | D     | G      |
| chr3  | 185044746 | T   | C   | 0                             | 32                           | 52              | 17               | CDS:PARL              | M     | V      |
| chr5  | 171270237 | T   | C   | 0                             | 23                           | 42              | 12               | CDS:FBXW11            | H     | R      |
| chr10 | 59656822  | T   | C   | 0                             | 30                           | 11              | 17               | CDS:IPMK              | T     | A      |
| chr11 | 1007466   | T   | C   | 0                             | 60                           | 22              | 10               | CDS:MUC6              | R     | G      |
| chr11 | 113182423 | T   | C   | 0                             | 37                           | 0               | 14               | CDS:USP28             | K     | E      |
| chr15 | 73433139  | A   | G   | 0                             | 20                           | 2               | 17               | CDS:NEIL1             | K     | R      |
| chr19 | 8867764   | T   | C   | 0                             | 31                           | 2               | 13               | CDS:MUC16             | T     | A      |
| chr19 | 11838035  | A   | G   | 0                             | 24                           | 10              | 15               | CDS:ZNF439            | K     | E      |

Supplemental Table 5. Full list of 52 fusion genes from transcriptome sequencing.

| Category          | Index | Donor gene          | Acceptor gene   | Chr   | Distance (Mb) | Number of discordant reads | Number of spanning reads | Evidence in whole-genome sequence |
|-------------------|-------|---------------------|-----------------|-------|---------------|----------------------------|--------------------------|-----------------------------------|
| Intra-chromosomal | 1     | <i>KIF5B</i>        | <i>RET</i>      | chr10 | 10.580        | 34                         | 60                       | YES (inversion)                   |
|                   | 2     | <i>KIF5B</i>        | <i>KIAA1462</i> | chr10 | 1.970         | 4                          | 4                        | -                                 |
|                   | 3     | <i>EEF1DP3</i>      | <i>FRY</i>      | chr13 | 0.133         | 3                          | 5                        | -                                 |
|                   | 4     | <i>RPS6KB1</i>      | <i>TMEM49</i>   | chr17 | 0.097         | 4                          | 31                       | -                                 |
|                   | 5     | <i>HACL1</i>        | <i>COLQ</i>     | chr3  | 0.075         | 3                          | 4                        | -                                 |
|                   | 6     | <i>TMEM56</i>       | <i>RWDD3</i>    | chr1  | 0.073         | 4                          | 11                       | -                                 |
|                   | 7     | <i>FAM18B2</i>      | <i>CDRT4</i>    | chr17 | 0.065         | 4                          | 29                       | -                                 |
|                   | 8     | <i>CTBS</i>         | <i>GNG5</i>     | chr1  | 0.065         | 6                          | 27                       | -                                 |
|                   | 9     | <i>METTL10</i>      | <i>FAM53B</i>   | chr10 | 0.054         | 2                          | 4                        | -                                 |
|                   | 10    | <i>AZGP1</i>        | <i>GJC3</i>     | chr7  | 0.048         | 5                          | 15                       | -                                 |
|                   | 11    | <i>NKX2-1</i>       | <i>SFTA3</i>    | chr14 | 0.046         | 3                          | 7                        | -                                 |
|                   | 12    | <i>ADSL</i>         | <i>SGSM3</i>    | chr22 | 0.036         | 5                          | 6                        | -                                 |
|                   | 13    | <i>ART4</i>         | <i>C12orf69</i> | chr12 | 0.034         | 3                          | 4                        | -                                 |
|                   | 14    | <i>LOC100131434</i> | <i>IDS</i>      | chrX  | 0.031         | 2                          | 11                       | -                                 |
|                   | 15    | <i>LOC100130093</i> | <i>SNAP47</i>   | chr1  | 0.030         | 2                          | 2                        | -                                 |
|                   | 16    | <i>C15orf57</i>     | <i>MRPL42P5</i> | chr15 | 0.025         | 2                          | 7                        | -                                 |
|                   | 17    | <i>MIA2</i>         | <i>CTAGE5</i>   | chr14 | 0.024         | 30                         | 102                      | -                                 |
|                   | 18    | <i>SH3D20</i>       | <i>ARHGAP27</i> | chr17 | 0.024         | 2                          | 10                       | -                                 |
|                   | 19    | <i>RBM14</i>        | <i>RBM4</i>     | chr11 | 0.023         | 16                         | 24                       | -                                 |
|                   | 20    | <i>GOLT1A</i>       | <i>KISS1</i>    | chr1  | 0.021         | 3                          | 2                        | -                                 |
|                   | 21    | <i>CLCF1</i>        | <i>POLD4</i>    | chr11 | 0.021         | 2                          | 4                        | -                                 |
|                   | 22    | <i>SLC43A3</i>      | <i>PRG2</i>     | chr11 | 0.020         | 13                         | 35                       | -                                 |
|                   | 23    | <i>PRKAA1</i>       | <i>TTC33</i>    | chr5  | 0.018         | 2                          | 4                        | -                                 |
|                   | 24    | <i>BMS1P4</i>       | <i>AGAP5</i>    | chr10 | 0.016         | 2                          | 3                        | -                                 |
|                   | 25    | <i>NOS1AP</i>       | <i>C1orf226</i> | chr1  | 0.015         | 3                          | 16                       | -                                 |
|                   | 26    | <i>MFSD7</i>        | <i>ATP5I</i>    | chr4  | 0.014         | 3                          | 9                        | -                                 |
|                   | 27    | <i>SCNN1A</i>       | <i>TNFRSF1A</i> | chr12 | 0.014         | 15                         | 42                       | -                                 |
|                   | 28    | <i>OSGIN1</i>       | <i>NECAB2</i>   | chr16 | 0.013         | 3                          | 10                       | -                                 |
|                   | 29    | <i>VAMP8</i>        | <i>VAMP5</i>    | chr2  | 0.011         | 4                          | 8                        | -                                 |
|                   | 30    | <i>NDUFB8</i>       | <i>SEC31B</i>   | chr10 | 0.010         | 4                          | 4                        | -                                 |
|                   | 31    | <i>C6orf47</i>      | <i>BAT3</i>     | chr6  | 0.009         | 2                          | 8                        | -                                 |
|                   | 32    | <i>SEC14L4</i>      | <i>SDC4P</i>    | chr22 | 0.008         | 3                          | 2                        | -                                 |

|                          |                  |                  |            |       |    |    |   |
|--------------------------|------------------|------------------|------------|-------|----|----|---|
| 33                       | <i>WDR81</i>     | <i>SERPINF2</i>  | chr17      | 0.007 | 5  | 30 | - |
| 34                       | <i>ARPC4</i>     | <i>TTLL3</i>     | chr3       | 0.007 | 11 | 12 | - |
| 35                       | <i>PMF1</i>      | <i>BGLAP</i>     | chr1       | 0.007 | 3  | 6  | - |
| 36                       | <i>ANKRD39</i>   | <i>ANKRD23</i>   | chr2       | 0.006 | 7  | 14 | - |
| 37                       | <i>CTSD</i>      | <i>LOC402778</i> | chr11      | 0.006 | 6  | 31 | - |
| 38                       | <i>ARL6IP1</i>   | <i>RPS15A</i>    | chr16      | 0.006 | 4  | 7  | - |
| 39                       | <i>ADCK4</i>     | <i>NUMBL</i>     | chr19      | 0.005 | 2  | 4  | - |
| 40                       | <i>ZNF606</i>    | <i>C19orf18</i>  | chr19      | 0.005 | 2  | 6  | - |
| 41                       | <i>ORMDL3</i>    | <i>GSDMB</i>     | chr17      | 0.004 | 3  | 2  | - |
| 42                       | <i>FCN3</i>      | <i>MAP3K6</i>    | chr1       | 0.004 | 4  | 2  | - |
| 43                       | <i>PLEKHM1P</i>  | <i>LOC146880</i> | chr17      | 0.004 | 4  | 11 | - |
| 44                       | <i>APOC4</i>     | <i>APOC2</i>     | chr19      | 0.003 | 4  | 6  | - |
| 45                       | <i>HARS2</i>     | <i>ZMAT2</i>     | chr5       | 0.003 | 5  | 6  | - |
| 46                       | <i>COL7A1</i>    | <i>UCN2</i>      | chr3       | 0.002 | 3  | 14 | - |
| 47                       | <i>NLRP1</i>     | <i>LOC728392</i> | chr17      | 0.002 | 2  | 2  | - |
| 48                       | <i>C17orf106</i> | <i>CDK3</i>      | chr17      | 0.001 | 3  | 9  | - |
| 49                       | <i>TAP1</i>      | <i>PSMB8</i>     | chr6       | 0.001 | 2  | 14 | - |
| 50                       | <i>CCDC142</i>   | <i>MRPL53</i>    | chr2       | 0.000 | 5  | 7  | - |
| 51                       | <i>APBB3</i>     | <i>SRA1</i>      | chr5       | 0.000 | 6  | 5  | - |
| <b>Inter-chromosomal</b> |                  |                  |            |       |    |    |   |
| 52                       | <i>RSP01</i>     | <i>HP</i>        | chr16;chr1 | -     | 2  | 3  | - |

Supplemental Table 6. A full list of expression levels of human genes identified from the transcriptome sequencing of cancer tissues of AK55, LC\_S1 - S5.

*SuppTable\_6\_expression\_levels.xls*

Depicted below is a preview of the full table.

| gene         | accession_ID | chr | start  | stop   | length | strand | AK55  | LC_S1 | LC_S2 | LC_S3 | LC_S4 | LC_S5 |
|--------------|--------------|-----|--------|--------|--------|--------|-------|-------|-------|-------|-------|-------|
| WASH7P       | NR_024540    | 1   | 14361  | 29370  | 1769   | -      | 7.24  | 3.12  | 3.43  | 4.36  | 0.98  | 1.97  |
| FAM138A      | NR_026818    | 1   | 34610  | 36081  | 1130   | -      | 0.00  | 0.00  | 0.00  | 0.00  | 0.00  | 0.00  |
| FAM138F      | NR_026820    | 1   | 34610  | 36081  | 1130   | -      | 0.00  | 0.00  | 0.00  | 0.00  | 0.00  | 0.00  |
| OR4F5        | NM_001005484 | 1   | 69090  | 70008  | 918    | +      | 0.00  | 0.00  | 0.00  | 0.00  | 0.00  | 0.00  |
| LOC100132062 | NR_028325    | 1   | 323891 | 328581 | 4370   | +      | 6.76  | 0.00  | 0.00  | 0.00  | 0.00  | 0.01  |
| LOC100132287 | NR_028322    | 1   | 323891 | 328581 | 4370   | +      | 6.76  | 0.00  | 0.00  | 0.00  | 0.00  | 0.01  |
| LOC100133331 | NR_028327    | 1   | 323891 | 328581 | 4273   | +      | 7.58  | 0.00  | 0.00  | 0.00  | 0.00  | 0.00  |
| OR4F16       | NM_001005277 | 1   | 367658 | 368597 | 939    | +      | 0.01  | 0.00  | 0.00  | 0.00  | 0.00  | 0.00  |
| OR4F29       | NM_001005221 | 1   | 367658 | 368597 | 939    | +      | 0.01  | 0.00  | 0.00  | 0.00  | 0.00  | 0.00  |
| OR4F3        | NM_001005224 | 1   | 367658 | 368597 | 939    | +      | 0.03  | 0.00  | 0.00  | 0.00  | 0.00  | 0.00  |
| NCRNA00115   | NR_024321    | 1   | 761585 | 762902 | 1317   | -      | 1.28  | 2.05  | 1.98  | 2.72  | 1.79  | 4.12  |
| LOC643837    | NR_015368    | 1   | 763063 | 789740 | 1543   | +      | 5.80  | 3.42  | 3.59  | 3.14  | 3.48  | 3.79  |
| FAM41C       | NR_027055    | 1   | 803450 | 812182 | 1706   | -      | 2.15  | 0.43  | 0.57  | 7.45  | 0.37  | 1.16  |
| FLJ39609     | NR_026874    | 1   | 852952 | 854817 | 496    | -      | 0.08  | 0.12  | 0.03  | 0.05  | 0.07  | 0.00  |
| SAMD11       | NM_152486    | 1   | 861120 | 879961 | 2554   | +      | 2.27  | 6.68  | 5.68  | 2.07  | 3.74  | 3.78  |
| NOC2L        | NM_015658    | 1   | 879582 | 894679 | 2800   | -      | 14.54 | 17.47 | 20.62 | 24.50 | 42.73 | 20.15 |
| KLHL17       | NM_198317    | 1   | 895966 | 901099 | 2564   | +      | 1.44  | 2.33  | 3.11  | 3.66  | 3.29  | 2.85  |
| PLEKHN1      | NM_001160184 | 1   | 901876 | 910484 | 2295   | +      | 1.38  | 1.08  | 2.06  | 1.55  | 2.56  | 1.36  |
| PLEKHN1      | NM_032129    | 1   | 901876 | 910484 | 2400   | +      | 1.36  | 1.06  | 2.18  | 1.51  | 2.52  | 1.36  |
| C10orf170    | NR_027693    | 1   | 910578 | 917473 | 3040   | -      | 0.36  | 0.36  | 0.51  | 0.24  | 0.68  | 0.41  |
| HES4         | NM_021170    | 1   | 934341 | 935552 | 962    | -      | 1.48  | 1.76  | 2.85  | 2.35  | 4.13  | 0.86  |

[Exon-by-exon RET expression among 6 samples]

| gene | accession | chrom | exon   | start    | end      | length | strand | AK55 | LC_S1 | LC_S2 | LC_S3 | LC_S4 | LC_S5 |
|------|-----------|-------|--------|----------|----------|--------|--------|------|-------|-------|-------|-------|-------|
| RET  | NM_020630 | 10    | exon1  | 43572516 | 43572779 | 263    | +      | 0.03 | 0.00  | 0.10  | 0.00  | 0.00  | 0.00  |
| RET  | NM_020630 | 10    | exon2  | 43595906 | 43596170 | 264    | +      | 0.00 | 0.29  | 0.38  | 0.11  | 0.00  | 0.18  |
| RET  | NM_020630 | 10    | exon3  | 43597789 | 43598077 | 288    | +      | 0.18 | 0.16  | 0.68  | 0.18  | 0.21  | 0.24  |
| RET  | NM_020630 | 10    | exon4  | 43600399 | 43600641 | 242    | +      | 0.06 | 0.25  | 0.41  | 0.01  | 0.24  | 0.00  |
| RET  | NM_020630 | 10    | exon5  | 43601823 | 43602019 | 196    | +      | 0.07 | 0.25  | 0.32  | 0.17  | 0.15  | 0.00  |
| RET  | NM_020630 | 10    | exon6  | 43604478 | 43604678 | 200    | +      | 0.24 | 0.88  | 0.33  | 0.01  | 0.10  | 0.53  |
| RET  | NM_020630 | 10    | exon7  | 43606654 | 43606913 | 259    | +      | 0.14 | 0.32  | 0.43  | 0.12  | 0.15  | 0.16  |
| RET  | NM_020630 | 10    | exon8  | 43607546 | 43607672 | 126    | +      | 0.11 | 0.31  | 0.00  | 0.04  | 0.09  | 0.10  |
| RET  | NM_020630 | 10    | exon9  | 43608300 | 43608411 | 111    | +      | 0.26 | 0.10  | 0.27  | 0.14  | 0.15  | 0.40  |
| RET  | NM_020630 | 10    | exon10 | 43609003 | 43609123 | 120    | +      | 0.40 | 0.91  | 0.58  | 0.22  | 0.04  | 0.00  |
| RET  | NM_020630 | 10    | exon11 | 43609927 | 43610184 | 257    | +      | 0.24 | 1.48  | 0.66  | 0.24  | 0.14  | 0.19  |
| RET  | NM_020630 | 10    | exon12 | 43612031 | 43612179 | 148    | +      | 4.25 | 0.29  | 12.50 | 0.00  | 0.14  | 0.09  |
| RET  | NM_020630 | 10    | exon13 | 43613820 | 43613928 | 108    | +      | 5.82 | 0.02  | 7.74  | 0.00  | 0.20  | 0.00  |
| RET  | NM_020630 | 10    | exon14 | 43614978 | 43615193 | 215    | +      | 4.49 | 1.10  | 8.41  | 0.16  | 0.10  | 0.20  |
| RET  | NM_020630 | 10    | exon15 | 43615528 | 43615651 | 123    | +      | 7.13 | 1.85  | 14.60 | 0.25  | 0.00  | 0.62  |
| RET  | NM_020630 | 10    | exon16 | 43617393 | 43617464 | 71     | +      | 7.45 | 1.41  | 17.86 | 0.04  | 0.00  | 0.00  |
| RET  | NM_020630 | 10    | exon17 | 43619118 | 43619256 | 138    | +      | 8.94 | 0.42  | 18.15 | 0.15  | 0.04  | 0.21  |
| RET  | NM_020630 | 10    | exon18 | 43620330 | 43620430 | 100    | +      | 8.88 | 0.00  | 15.81 | 0.21  | 0.31  | 0.44  |
| RET  | NM_020630 | 10    | exon19 | 43622022 | 43622952 | 930    | +      | 8.21 | 0.89  | 8.37  | 0.05  | 0.22  | 0.12  |

Supplemental Table 7. Summary statistics of transcriptome sequencing from primary lung adenocarcinoma tissues of LC\_S1 - S5.

| Sample | # of total reads | # of aligned reads | Read length | Total throughput<br>(aligned) | aligned % |
|--------|------------------|--------------------|-------------|-------------------------------|-----------|
| LC_S1  | 71,707,630       | 52,378,115         | 2 x 101 bp  | 5,290,189,615                 | 73.04     |
| LC_S2  | 89,309,594       | 66,196,831         | 2 x 101 bp  | 6,685,879,931                 | 74.12     |
| LC_S3  | 104,898,166      | 78,419,618         | 2 x 101 bp  | 7,920,381,418                 | 74.76     |
| LC_S4  | 96,843,482       | 70,747,235         | 2 x 101 bp  | 7,145,470,735                 | 73.05     |
| LC_S5  | 92,899,066       | 69,604,137         | 2 x 101 bp  | 7,030,017,837                 | 74.92     |

## C. Supplemental Figures

Supplemental Figure 1. Distribution of read-allele frequency (count of SNV reads / (count of SNV + wildtype reads)) in the whole-genome sequencing of liver metastatic lung cancer tissue of AK55.

We selected 235,706 autosomal SNVs, which were known in dbSNP 130 and which we had observed at minor allele frequency = 50 % from whole-genome sequencing of 10 Koreans<sup>4</sup>. Assuming Hardy-Weinberg equilibrium in AK55, we would then expect to find 25% of the loci to be homozygotic SNV, 25% to be homozygotic wildtype, and 50% heterozygotic.

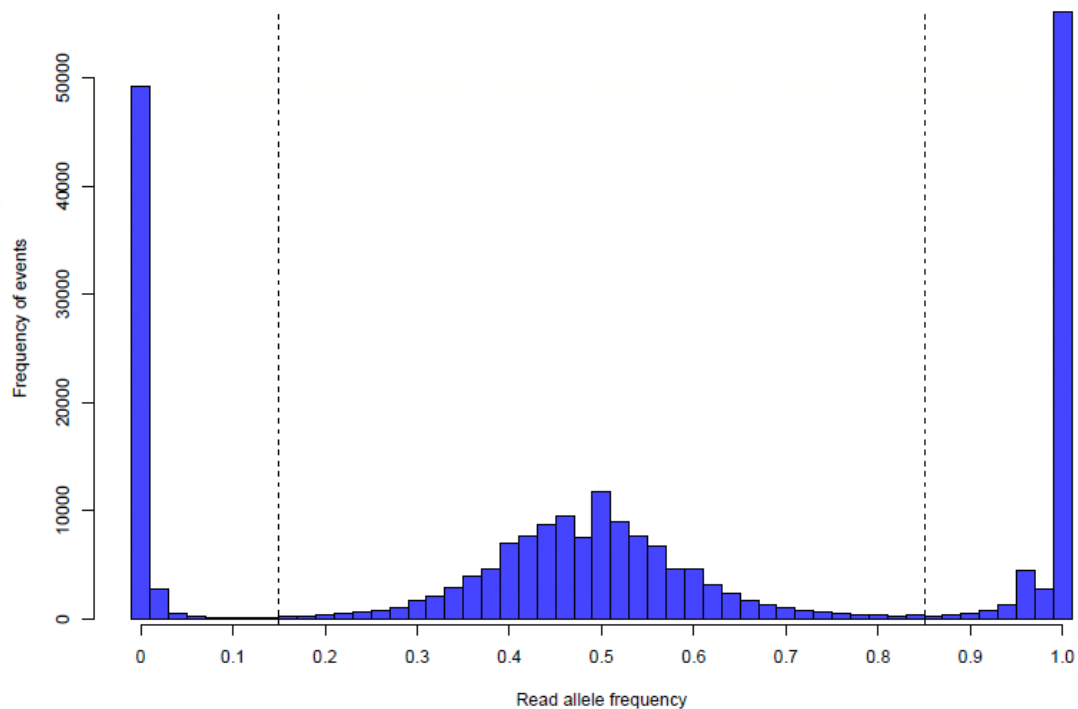



Supplemental Figure 2. Comparison of read-depth of whole-genome sequence for 70 CDS large deletion candidates from liver metastatic lung cancer tissue and blood.

*SuppFigure\_2\_CDSlarge\_deletion\_candidates.pdf*

Depicted below is a preview of the full figures.

5' and 3' flanking regions were shown with large deletion candidate regions. The boundaries of large deletions are shown by green vertical lines. Blue line; read-depth of liver metastatic lung cancer tissue of AK55 (normalized to 25 x). Black line; read-depth of blood of AK55 (normalized to 25 x). No somatic large deletion was identified in this analysis.

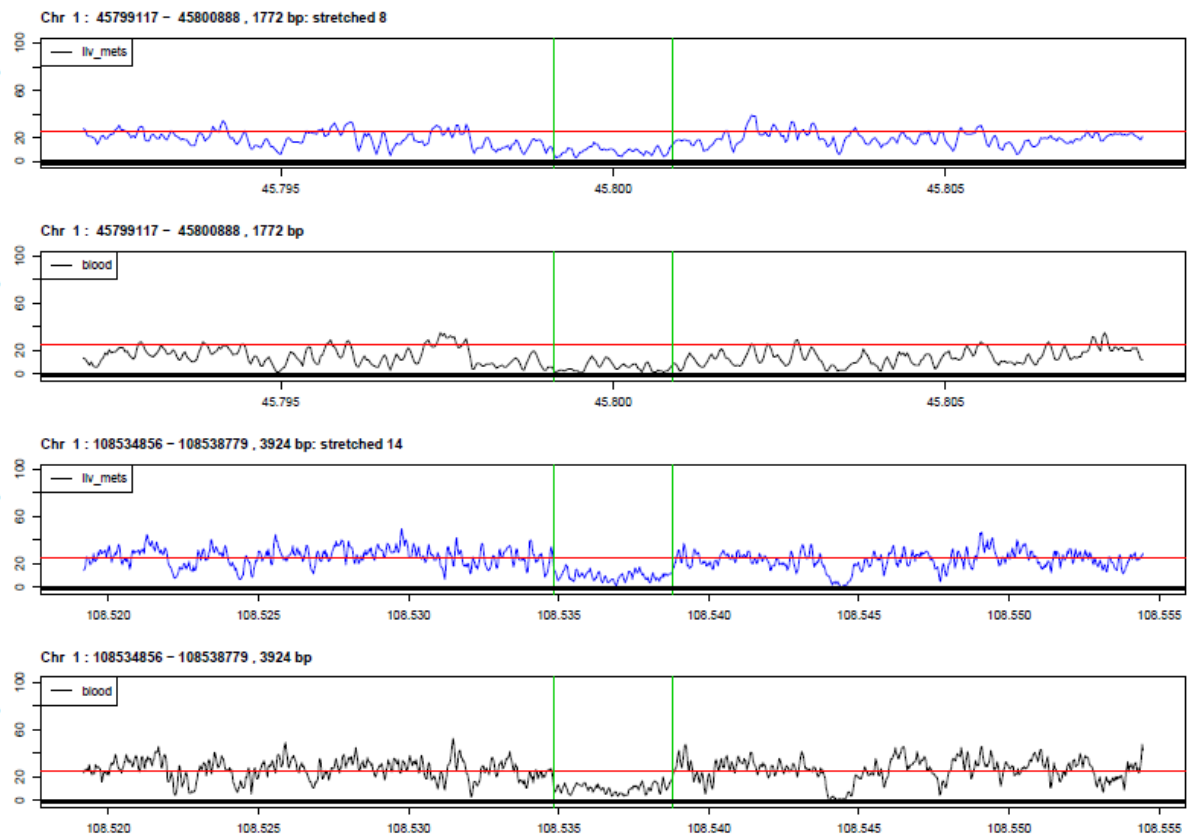

Supplemental Figure 3. Identification of breakpoint of the *KIF5B-RET* fusion gene in LC\_S6 using Sanger sequencing.

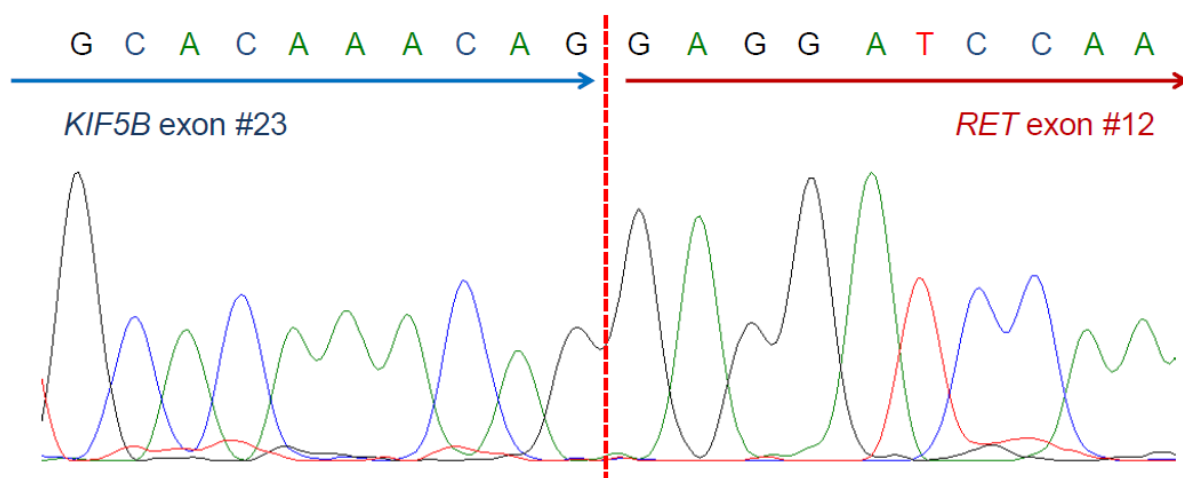

Supplemental Figure 4. RET expression levels in lung adenocarcinomas deposited in TCGA.

We analyzed the expression microarray data of 32 lung adenocarcinomas in the TCGA project. Of these, 3 samples showed clear over-expression of *RET*. These data cannot confirm that the *KIF5B-RET* fusion gene exists in the cancer genome of those 3 samples. However, the data clearly show that there is a subset of lung cancers, where *RET* proto-oncogene is highly expressed.

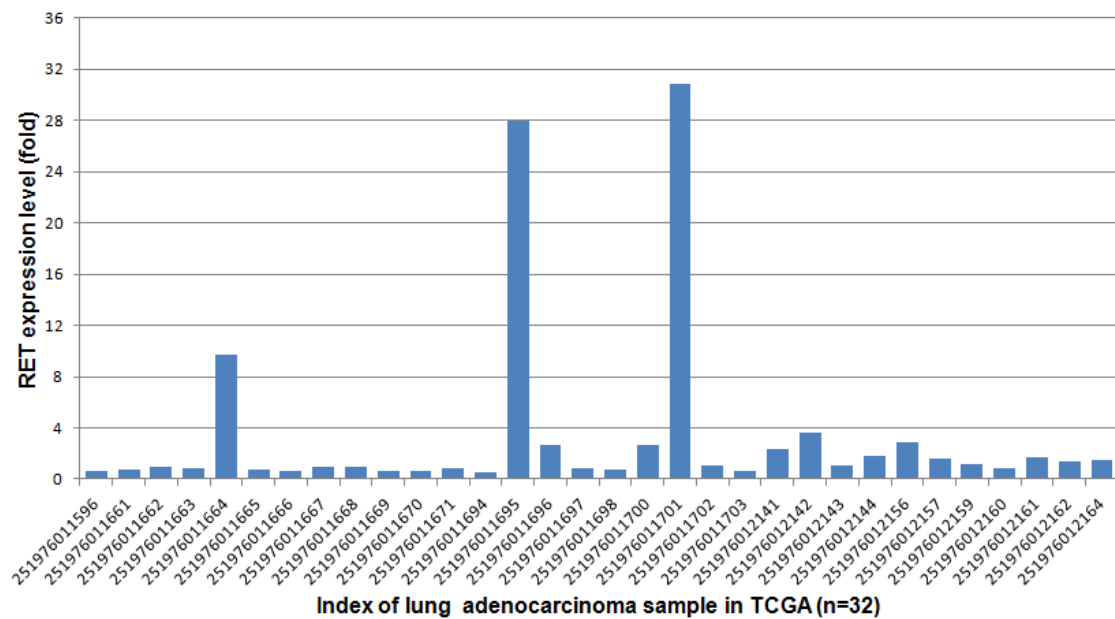

Supplemental Figure 5. Schematic diagram representing the “Spurious Reads”.

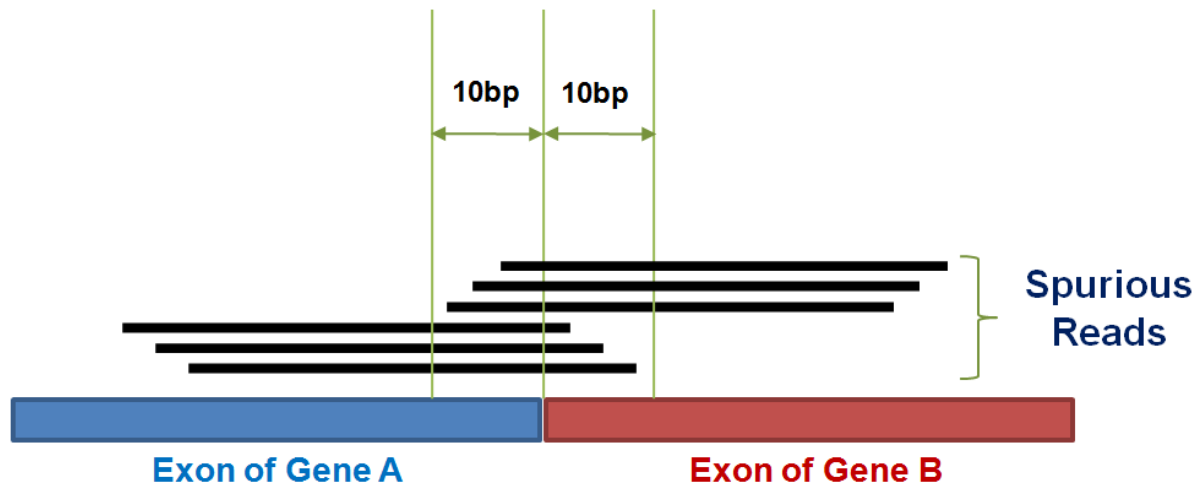

Supplemental Figure 6. Schematic diagram representing the “Stacked/ladder-like pattern”.

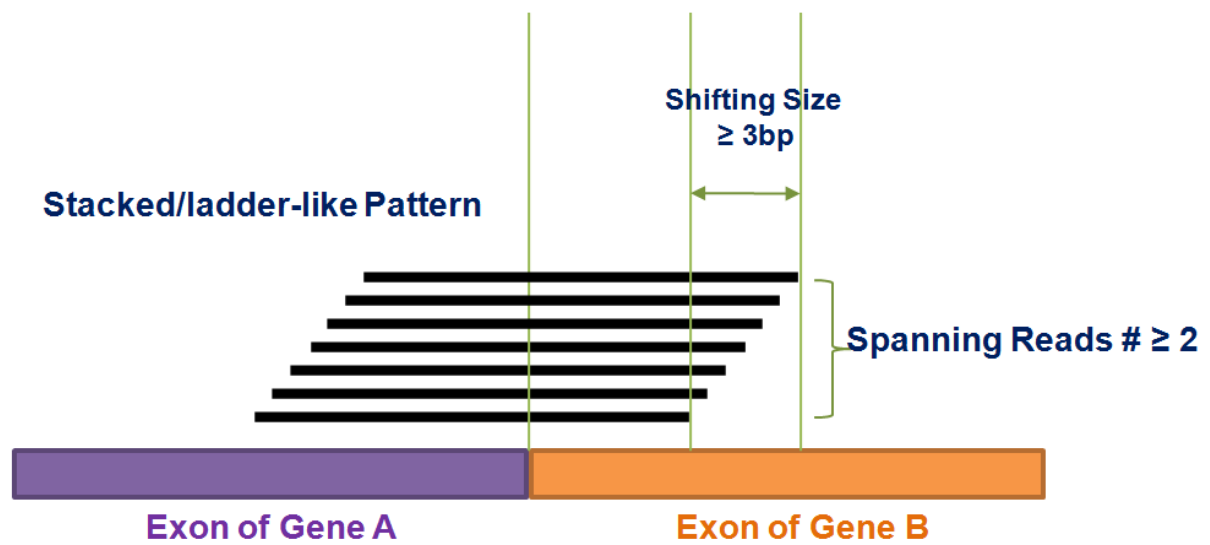

## D. References

1. Altschul SF, Gish W, Miller W, Myers EW, Lipman DJ. Basic local alignment search tool. *J Mol Biol* 1990;215:403-10.
2. Edgren H, Murumagi A, Kangaspeska S, et al. Identification of fusion genes in breast cancer by paired-end RNA-sequencing. *Genome Biol* 2011;12:R6.
3. Wu TD, Nacu S. Fast and SNP-tolerant detection of complex variants and splicing in short reads. *Bioinformatics* 2010;26:873-81.
4. Ju YS, Kim JI, Kim S, et al. Extensive genomic and transcriptional diversity identified through massively parallel DNA and RNA sequencing of eighteen Korean individuals. *Nat Genet* 2011.
